# Supplementary material
Source: publisher figshare collection journal article supplement (https://asha.figshare.com/ndownloader/files/29492703)
Supplement: Supplementary file 1 [file 29492703]

**Supplemental Material S1.** Survey items on team science practices in speech-language pathology and audiology.

Which of the following best describes your current position?

- Pre-doctoral/ graduate student
  - Post-doctoral
  - Instructor (non-tenure track)
  - Clinical Faculty (Assistant, Associate, Full)
  - Assistant Professor, tenure-track
  - Associate Professor, tenured
  - Full Professor, tenured
  - Research Faculty (Assistant, Associate, Full)
- 

Please describe your current institution:

- Public University
  - Private University
- 

What is the highest degree offered in your program?

- Undergraduate degree
  - Master's degree
  - Practice or Clinical Doctorate
  - Ph.D
-

Which Big Nine area best reflects your primary area of research (please choose one).

- Speech/Articulation
  - Fluency
  - Cognitive Communication
  - Social Communication
  - Expressive and Receptive Language
  - Voice and Resonance
  - Feeding and Swallowing
  - Auditory Habilitation/ Rehabilitation
  - Augmentative and Alternative Communication
- 

Please choose the age group that best reflects your primary area of research.

- Early Intervention/ Preschool
  - School age
  - Adult
  - Lifespan
-

What is your gender identity?

- Man
  - Woman
  - Transgender
  - Other \_\_\_\_\_
- 

What best describes your race and ethnicity?

- African American/Black
  - Asian/Pacific Islander
  - Caribbean descent
  - Hispanic/Latino/a and/or of Spanish origin
  - Multiracial
  - Native American/American Indian
  - White
  - Other \_\_\_\_\_
- 

Have you participated in trainings about team science in your doctoral training or as a part of your current position?

- Yes
  - No
-

Please choose the types of training in team science that you have received. You may check all that apply.

- Webinars on team science offered by funding agencies
  - Workshop series offered by your institution
  - Webinars on team science offered by your institution
  - Conferences
  - Graduate course
  - Other \_\_\_\_\_
- 

When you consider your research group or research team, what team members do you currently engage with in research? You may check all that apply.

- a research team in my lab at my institution
  - community partners (e.g., hospital personnel, local educational agencies)
  - a group of faculty members within my department at my institution
  - researchers in other disciplines within my institution who partner with me on research
  - researchers within my discipline at other institutions
  - researchers in other disciplines at other agencies or institutions
-

To help us report the geographic distribution of respondents, please identify the state where you reside currently.

State Name or Abbreviation \_\_\_\_\_

-----

Do you currently consider yourself part of an interdisciplinary research team?

- Yes
- No
- Uncertain

-----

To what extent is team-based research encouraged or rewarded in your institution's policies for promotion and tenure review?

- Strongly encouraged or rewarded
- Somewhat encouraged or rewarded
- Not encouraged or rewarded (e.g., emphasis is placed on single-authored publications)
- Strongly discouraged (e.g., focus is on single-authored publications)

-----

Does your institution offer training in team science or interdisciplinary collaborative research?

- Yes
- No
- Uncertain

To what extent do you agree that it is easy to locate and access other researchers for cross-disciplinary collaboration?

- Strongly agree
- Agree
- Somewhat agree
- Somewhat disagree
- Disagree
- Strongly disagree

---

Considering your research productivity on an average year, how many manuscripts would you estimate you typically publish per year? (Please enter a single number rather than a range)

---

---

On average, how many co-authors would you estimate you typically have per publication? (Please enter a single number rather than a range)

---

How important is it to you to be first-author?

- Very importance
- Important
- Somewhat important
- Somewhat unimportant
- Unimportant
- Very unimportant

---

In what ways has collaborative research been advantageous to you? What benefits have you experienced?

---

---

What barriers or challenges have you experienced in collaborative research?

---

Please indicate how strongly you agree or disagree with each of the following statements:



|                                                                                                                                                                                                         | Strongly Disagree     | Disagree              | Somewhat Disagree     | Neutral               | Somewhat Agree        | Agree                 | Strongly Agree        |
|---------------------------------------------------------------------------------------------------------------------------------------------------------------------------------------------------------|-----------------------|-----------------------|-----------------------|-----------------------|-----------------------|-----------------------|-----------------------|
| I tend to be more productive working on my own research projects than working as a member of a collaborative research team.                                                                             | <input type="radio"/> |
| There is so much work to be done within my field that it is important to focus my research efforts with others in my own discipline.                                                                    | <input type="radio"/> |
| The research questions I am often interested in generally do not warrant collaboration from other disciplines.                                                                                          | <input type="radio"/> |
| While working on a research project within my discipline, I sometimes feel it is important to seek the perspective of other disciplines when trying to answer particular parts of my research question. | <input type="radio"/> |

Although I rely primarily on knowledge from my primary field of interest, I usually work interactively with colleagues from other disciplines to address a research problem.

The benefits of collaboration among scientists from different disciplines usually outweigh the inconveniences and costs of such work.

In my collaborations with others I integrate research methods from different disciplines.

In my own work, I typically incorporate perspectives from disciplinary orientations that are different from my own.

Although I was trained in a particular discipline, I devote much of my time to understanding other disciplines in order to inform my research.

In my  
collaborations  
with others I  
integrate theories  
and models from  
different  
disciplines.

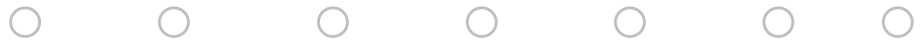

Please assess the frequency with which you typically engage in each of the activities listed below.

|                                                                                                                                                 | Never                 | Rarely                | Once a Year           | Twice a Year          | Quarterly             | Monthly               | Weekly                |
|-------------------------------------------------------------------------------------------------------------------------------------------------|-----------------------|-----------------------|-----------------------|-----------------------|-----------------------|-----------------------|-----------------------|
| Read journals or publications outside of your primary field.                                                                                    | <input type="radio"/> |
| Attend meetings or conferences outside of your primary field.                                                                                   | <input type="radio"/> |
| Participate in working groups or committees with the intent to integrate ideas with other participants.                                         | <input type="radio"/> |
| Obtain new insights into your own work through discussion with colleagues who come from different fields or disciplinary orientations.          | <input type="radio"/> |
| Modify your own work or research agenda as a result of discussions with colleagues who come from different fields or disciplinary orientations. | <input type="radio"/> |
| Establish links with colleagues from different fields or disciplinary orientations that have led to or may lead to future collaborative work.   | <input type="radio"/> |

Please indicate how strongly you agree or disagree with each of the following statements.

|                                                      | Strongly Disagree     | Disagree              | Somewhat Disagree     | Neutral               | Somewhat Agree        | Agree                 | Strongly Agree        |
|------------------------------------------------------|-----------------------|-----------------------|-----------------------|-----------------------|-----------------------|-----------------------|-----------------------|
| I find teamwork to be personally valuable.           | <input type="radio"/> |
| I find teamwork to be professionally valuable.       | <input type="radio"/> |
| Collaboration has improved my research productivity. | <input type="radio"/> |

Please indicate how strongly you agree or disagree with each of the following statements:

|                                                                                                 | Strongly Disagree     | Disagree              | Somewhat disagree     | Neutral               | Somewhat agree        | Agree                 | Strongly agree        |
|-------------------------------------------------------------------------------------------------|-----------------------|-----------------------|-----------------------|-----------------------|-----------------------|-----------------------|-----------------------|
| If I make a mistake in my research team, it is held against me.                                 | <input type="radio"/> |
| Members of my research team are able to bring up problems and tough issues.                     | <input type="radio"/> |
| People on my research team reject others for being different.                                   | <input type="radio"/> |
| It is safe to take risks in my research team.                                                   | <input type="radio"/> |
| It is difficult to ask other members of my research team for help.                              | <input type="radio"/> |
| No one on my research team would deliberately act in a way that undermines my efforts.          | <input type="radio"/> |
| Working with members of my research team, my unique skills and talents are valued and utilized. | <input type="radio"/> |
